# Supplementary material for: Vitamin C Sensitizes Pancreatic Cancer Cells to Erastin-Induced Ferroptosis by Activating the AMPK/Nrf2/HMOX1 Pathway
Source: Oxid Med Cell Longev. 2022 Jul 19;2022:5361241. doi: 10.1155/2022/5361241 (PMC9338737; doi:10.1155/2022/5361241)
Supplement: Supplementary 2 — Table S1: shRNAs used in this study. [file 5361241.f2.xlsx]

## Sheet: Sheet1
Table S1. shRNAs used in this study
RNA	5’	stem	loop	stem	3’
GLUT1 sh1 -F	Ccgg	gcCACACTATTACCATGAGAA	CTCGAG	TTCTCATGGTAATAGTGTGGC	TTTTTg
GLUT1 sh1 -R	aattcaaaaa	gcCACACTATTACCATGAGAA	CTCGAG	TTCTCATGGTAATAGTGTGGC
GLUT1 sh2 -F	Ccgg	ctTCTATTACTCCACGAGCAT	CTCGAG	ATGCTCGTGGAGTAATAGAAG	TTTTTg
GLUT1 sh2 -R	aattcaaaaa	ctTCTATTACTCCACGAGCAT	CTCGAG	ATGCTCGTGGAGTAATAGAAG
GLUT1 sh3 -F	Ccgg	ctTCAAAGTTCCTGAGACTAA	CTCGAG	TTAGTCTCAGGAACTTTGAAG	TTTTTg
GLUT1 sh3 -R	aattcaaaaa	ctTCAAAGTTCCTGAGACTAA	CTCGAG	TTAGTCTCAGGAACTTTGAAG
