# Supplementary material for: Vitamin C Sensitizes Pancreatic Cancer Cells to Erastin-Induced Ferroptosis by Activating the AMPK/Nrf2/HMOX1 Pathway
Source: Oxid Med Cell Longev. 2022 Jul 19;2022:5361241. doi: 10.1155/2022/5361241 (PMC9338737; doi:10.1155/2022/5361241)
Supplement: Supplementary 3 — Table S2: primer sequences used for qRT-PCR. [file 5361241.f3.xlsx]

## Sheet: Sheet1
Table S2.Primer sequences used for qRT-PCR
Gene	Primer sequence
GLUT1	F: 5’-TGCTCCTGGTTCTGTTCTTCATCTTC-3’
	R: 5’-CTCCTCGGGTGTCTTGTCACTTTG-3’
HMOX1	F: 5’-CCTCCCTGTACCACATCTATGT-3’
	R: 5’GCTCTTCTGGGAAGTAGACAG-3’
FTH1	F: 5’-TTCAACAGTGCTTGGACGGA-3’
	R: 5’ATCACTGTCTCCCAGGGTGT-3’
NCOA4	F: 5’-TTGGAGCTTGCTATTGGTGGAGTTC-3’
	R: 5’-CCATACCTCACGGCTTCTAAGACATTC-3’
CP	F: 5’-GGGCCAATGAAAATATGCAAGA-3’
	R: 5’-CTGATCAGGTGCAGTTGTAAAC-3’
β-actin	F: 5’-TGGCACCCAGCACAATGAA-3’
	R: 5’-CTAAGTCATAGTCCGCCTAGAAGCA-3’
SLC7A11	F: 5’-TCTCCAAAGGAGGTTACCTGC-3’
	R: 5’-AGACTCCCCTCAGTAAAGTGAC-3’
GPX4	F: 5’-ACCGAAGTAAACTACACTCAG-3’
	R: 5’-GGCGAACTCTTTGATCTCTT-3’
NRF2	F: 5’-TTCAGCAGCATCCTCTCCACAG-3’
	R: 5’-GCATGCTGTTGCTGATACTGG-3’
