# Supplementary material for: Vitamin C Sensitizes Pancreatic Cancer Cells to Erastin-Induced Ferroptosis by Activating the AMPK/Nrf2/HMOX1 Pathway
Source: Oxid Med Cell Longev. 2022 Jul 19;2022:5361241. doi: 10.1155/2022/5361241 (PMC9338737; doi:10.1155/2022/5361241)
Supplement: Supplementary 4 — Table S3: lists of differentially expressed genes. [file 5361241.f4.xlsx]

## Sheet: EC_D.heatmap_list
Table S3. Lists of differentially expressed genes
Name
ENSG00000140284
ENSG00000101084
ENSG00000204983
ENSG00000132837
ENSG00000073146
ENSG00000115468
ENSG00000006606
ENSG00000235530
ENSG00000286795
ENSG00000165197
ENSG00000227218
ENSG00000012124
ENSG00000187498
ENSG00000139725
ENSG00000219507
ENSG00000100292
ENSG00000198569
ENSG00000010671
ENSG00000124216
ENSG00000204010
ENSG00000196406
ENSG00000233614
ENSG00000236453
ENSG00000273173
ENSG00000142224
ENSG00000225964
ENSG00000069431
ENSG00000288586
ENSG00000238015
ENSG00000079393
ENSG00000285736
ENSG00000166963
ENSG00000227234
ENSG00000136696
ENSG00000143199
ENSG00000132429
ENSG00000185272
ENSG00000168032
ENSG00000254639
ENSG00000136999
ENSG00000168685
ENSG00000138678
ENSG00000105967
ENSG00000120949
ENSG00000011422
ENSG00000185479
ENSG00000164970
ENSG00000065600
ENSG00000152137
ENSG00000213190
ENSG00000125571
ENSG00000154277
ENSG00000164411
ENSG00000236081
ENSG00000266401
ENSG00000182261
ENSG00000226781
ENSG00000143603
ENSG00000149564
ENSG00000288007
ENSG00000196092
ENSG00000279199
ENSG00000144366
ENSG00000281903
ENSG00000229544
ENSG00000118777
ENSG00000137747
ENSG00000058866
ENSG00000229677
ENSG00000134321
ENSG00000169248
ENSG00000173702
ENSG00000279013
ENSG00000283646
ENSG00000095739
ENSG00000237596
ENSG00000156510
ENSG00000258791
ENSG00000244405
ENSG00000286042
ENSG00000011590
ENSG00000172183
ENSG00000186207
ENSG00000236279
ENSG00000154153
ENSG00000204866
ENSG00000164188
ENSG00000113532
ENSG00000235897
ENSG00000282021
ENSG00000188818
ENSG00000286550
ENSG00000162892
ENSG00000253227
ENSG00000270607
ENSG00000215267
ENSG00000118939
ENSG00000167549
ENSG00000156755
ENSG00000165443
ENSG00000271821
ENSG00000253214
ENSG00000137841
ENSG00000253408
ENSG00000241544
ENSG00000267056
ENSG00000284543
ENSG00000115009
ENSG00000196812
ENSG00000269729
ENSG00000108932
ENSG00000171855
ENSG00000259436
ENSG00000287796
ENSG00000123496
ENSG00000150510
ENSG00000230092
ENSG00000167612
ENSG00000235899
ENSG00000280147
ENSG00000204099
ENSG00000274414
ENSG00000188596
ENSG00000095752
ENSG00000182393
ENSG00000170848
ENSG00000138347
ENSG00000115844
ENSG00000117013
ENSG00000170369
ENSG00000253339
ENSG00000128710
ENSG00000167767
ENSG00000138798
ENSG00000281641
ENSG00000118785
ENSG00000259985
ENSG00000162614
ENSG00000286153
ENSG00000224383
ENSG00000250508
ENSG00000252355
ENSG00000084734
ENSG00000228204
ENSG00000164867
ENSG00000102032
ENSG00000274712
ENSG00000088543
ENSG00000147408
ENSG00000234459
ENSG00000141968
ENSG00000167614
ENSG00000275202
ENSG00000274849
ENSG00000205488
ENSG00000235586
ENSG00000271404
ENSG00000139269
ENSG00000260386
ENSG00000127528
ENSG00000136244
ENSG00000276855
ENSG00000176438
ENSG00000254872
ENSG00000130513
ENSG00000179178
ENSG00000233198
ENSG00000140297
ENSG00000196208
ENSG00000127954
ENSG00000176945
ENSG00000140105
ENSG00000237330
ENSG00000153902
ENSG00000166250
ENSG00000116701
ENSG00000133328
ENSG00000198832
ENSG00000088826
ENSG00000197191
ENSG00000181045
ENSG00000171658
ENSG00000254632
ENSG00000108387
ENSG00000135604
ENSG00000198814
ENSG00000135114
ENSG00000271503
ENSG00000167550
ENSG00000155918
ENSG00000197943
ENSG00000100439
ENSG00000203808
ENSG00000178033
ENSG00000119922
ENSG00000138646
ENSG00000211451
ENSG00000171903
ENSG00000176532
ENSG00000125144
ENSG00000160145
ENSG00000224251
ENSG00000251985
ENSG00000079263
ENSG00000161011
ENSG00000157150
ENSG00000059728
ENSG00000276900
ENSG00000087086
ENSG00000042286
ENSG00000100036
ENSG00000173221
ENSG00000189120
ENSG00000065833
ENSG00000128011
ENSG00000023909
ENSG00000228322
ENSG00000243849
ENSG00000199477
ENSG00000204529
ENSG00000141293
ENSG00000217825
ENSG00000237101
ENSG00000268833
ENSG00000287335
ENSG00000215899
ENSG00000253686
ENSG00000103089
ENSG00000123143
ENSG00000167861
ENSG00000119411
ENSG00000085831
ENSG00000158458
ENSG00000198431
ENSG00000172602
ENSG00000174567
ENSG00000102981
ENSG00000249378
ENSG00000140961
ENSG00000111110
ENSG00000183578
ENSG00000148344
ENSG00000224769
ENSG00000196139
ENSG00000151632
ENSG00000187134
ENSG00000001084
ENSG00000186212
ENSG00000279722
ENSG00000174004
ENSG00000207973
ENSG00000107954
ENSG00000123689
ENSG00000144857
ENSG00000181652
ENSG00000141682
ENSG00000162772
ENSG00000181523
ENSG00000244476
ENSG00000131711
ENSG00000136695
ENSG00000258011
ENSG00000159753
ENSG00000125538
ENSG00000128713
ENSG00000136688
ENSG00000143001
ENSG00000162009
ENSG00000231683
ENSG00000138135
ENSG00000162891
ENSG00000137261
ENSG00000239948
ENSG00000187690
ENSG00000273143
ENSG00000204381
ENSG00000121101
ENSG00000286650
ENSG00000111275
ENSG00000145103
ENSG00000104723
ENSG00000173825
ENSG00000003249
ENSG00000131095
ENSG00000232187
ENSG00000260710
ENSG00000137875
ENSG00000185467
ENSG00000179776
ENSG00000204442
ENSG00000279717
ENSG00000231389
ENSG00000234626
ENSG00000251002
ENSG00000196593
ENSG00000223553
ENSG00000222881
ENSG00000253499
ENSG00000096006
ENSG00000170961
ENSG00000187037
ENSG00000167552
ENSG00000174640
ENSG00000123342
ENSG00000279019
ENSG00000113140
ENSG00000251455
ENSG00000224592
ENSG00000251450
ENSG00000257017
ENSG00000196668
ENSG00000225493
ENSG00000107186
ENSG00000007933
ENSG00000254530
ENSG00000279805
ENSG00000239906
ENSG00000143520
ENSG00000213963
ENSG00000143536
ENSG00000286974
ENSG00000226250
ENSG00000260978
ENSG00000182752
ENSG00000240032
ENSG00000237988
ENSG00000228997
ENSG00000230739
ENSG00000281100
ENSG00000248445
ENSG00000279022
ENSG00000150722
ENSG00000254951
ENSG00000177694
ENSG00000286811
ENSG00000212124
ENSG00000235407
ENSG00000178934
ENSG00000120156
ENSG00000155093
ENSG00000245888
ENSG00000278917
ENSG00000160181
ENSG00000140955
ENSG00000163283
ENSG00000186645
ENSG00000249158
ENSG00000089692
ENSG00000116745
ENSG00000160182
ENSG00000228253
ENSG00000231270
ENSG00000164604
ENSG00000167525
ENSG00000102271
ENSG00000166402
ENSG00000154188
ENSG00000233232
ENSG00000139899
ENSG00000150636
ENSG00000246898
ENSG00000284526
ENSG00000181126
ENSG00000168916
ENSG00000187193
ENSG00000214357
ENSG00000204060
ENSG00000136378
ENSG00000178573
ENSG00000091428
ENSG00000116785
ENSG00000237975
ENSG00000250305
ENSG00000196167
ENSG00000247809
ENSG00000132639
ENSG00000184613
ENSG00000233554
ENSG00000150630
ENSG00000184564
ENSG00000231298
ENSG00000230280
ENSG00000285755
ENSG00000142408
ENSG00000279277
ENSG00000286940
ENSG00000232774
ENSG00000275395
ENSG00000228459
ENSG00000230638
ENSG00000277883
ENSG00000134986
ENSG00000150625
ENSG00000122176
ENSG00000197057
ENSG00000091128
ENSG00000255491
ENSG00000156475
ENSG00000168398
ENSG00000230943
ENSG00000287406
ENSG00000187398
ENSG00000280339
ENSG00000236266
ENSG00000279900
ENSG00000168743
ENSG00000287709
ENSG00000169605
ENSG00000229140
ENSG00000241007
ENSG00000253971
ENSG00000173862
ENSG00000287023
ENSG00000273004
ENSG00000278570
ENSG00000280739
ENSG00000184856
ENSG00000169439
ENSG00000273301
ENSG00000101850
ENSG00000118495
ENSG00000198734
ENSG00000143847
ENSG00000229267
ENSG00000114268
ENSG00000177943
ENSG00000149212
ENSG00000154310
ENSG00000171914
ENSG00000140527
ENSG00000185002
ENSG00000143556
ENSG00000235649
ENSG00000100097
ENSG00000186081
ENSG00000132031
ENSG00000114115
ENSG00000134333
ENSG00000167613
ENSG00000144406
ENSG00000247774
ENSG00000189058
ENSG00000286403
ENSG00000011465
ENSG00000064989
ENSG00000205809
ENSG00000279584
ENSG00000125848
ENSG00000153802
ENSG00000267549
ENSG00000170409
ENSG00000226237
ENSG00000145934
ENSG00000232685
ENSG00000226813
ENSG00000227507
ENSG00000258658
ENSG00000154263
ENSG00000231890
ENSG00000019582
ENSG00000103569
ENSG00000244694
ENSG00000179826
ENSG00000206199
ENSG00000042980
ENSG00000155761
ENSG00000171115
ENSG00000242265
ENSG00000038427
ENSG00000251410
ENSG00000087128
ENSG00000241743
ENSG00000225206
ENSG00000235865
ENSG00000230975
ENSG00000248727
ENSG00000267904
ENSG00000174564
ENSG00000124143
ENSG00000236397
ENSG00000184500
ENSG00000197405
ENSG00000168209
ENSG00000266714
ENSG00000272320
ENSG00000172638
ENSG00000102854
ENSG00000136883
ENSG00000120324
ENSG00000258701
ENSG00000270115
ENSG00000149256
ENSG00000143333
ENSG00000214822
ENSG00000093100
ENSG00000147168
ENSG00000253554
ENSG00000267121
ENSG00000147027
ENSG00000074706
ENSG00000231119
ENSG00000151023
ENSG00000249631
ENSG00000232855
ENSG00000103888
ENSG00000115155
ENSG00000183778
ENSG00000171401
ENSG00000265763
ENSG00000261068
ENSG00000073910
ENSG00000187554
ENSG00000242948
ENSG00000283959
ENSG00000134873
ENSG00000108984
ENSG00000197085
ENSG00000235849
ENSG00000272223
ENSG00000108950
ENSG00000166741
ENSG00000245498
ENSG00000139973
ENSG00000263513
ENSG00000178343
ENSG00000139354
ENSG00000130270
ENSG00000188859
ENSG00000196159
ENSG00000112984
ENSG00000166106
ENSG00000166343
ENSG00000185015
ENSG00000250657
ENSG00000203872
ENSG00000164418
ENSG00000182050
ENSG00000120279
ENSG00000260265
ENSG00000112320
ENSG00000242207
ENSG00000244094
ENSG00000150275
ENSG00000188257
ENSG00000259414
ENSG00000150471
ENSG00000279041
ENSG00000102837
ENSG00000168542
ENSG00000133135
ENSG00000184330
ENSG00000018236
ENSG00000026025
ENSG00000152495
ENSG00000143355
ENSG00000153956
ENSG00000187908
ENSG00000198768
ENSG00000254503
ENSG00000256802
ENSG00000113361
ENSG00000267710
ENSG00000139155
ENSG00000263874
ENSG00000217733
ENSG00000287527
ENSG00000148053
ENSG00000267141
ENSG00000121743
ENSG00000145506
ENSG00000169884
ENSG00000004777
ENSG00000167772
ENSG00000120738
ENSG00000104419
ENSG00000147257
ENSG00000246859
ENSG00000143382
ENSG00000188107
ENSG00000130592
ENSG00000276386
ENSG00000132561
ENSG00000283378
ENSG00000100767
ENSG00000007255
ENSG00000095370
ENSG00000255142
ENSG00000138131
ENSG00000167759
ENSG00000260763
ENSG00000204362
ENSG00000273448
ENSG00000105246
ENSG00000204262
ENSG00000219736
ENSG00000236986
ENSG00000229380
ENSG00000272953
ENSG00000182310
ENSG00000143590
ENSG00000110375
ENSG00000197587
ENSG00000180447
ENSG00000198515
ENSG00000197959
ENSG00000257084
ENSG00000119943
ENSG00000182040
ENSG00000227300
ENSG00000123384
ENSG00000187244
ENSG00000268628
ENSG00000162552
ENSG00000185585
ENSG00000103145
ENSG00000261115
ENSG00000058668
ENSG00000154556
ENSG00000169855
ENSG00000254854
ENSG00000163286
ENSG00000173546
ENSG00000094916
ENSG00000183762
ENSG00000171346
ENSG00000185361
ENSG00000130829
ENSG00000131650
ENSG00000172986
ENSG00000100739
ENSG00000134853
ENSG00000228288
ENSG00000197249
ENSG00000279141
ENSG00000196126
ENSG00000076716
ENSG00000234134
ENSG00000115596
ENSG00000225762
ENSG00000020181
ENSG00000257429
ENSG00000072071
ENSG00000231336
ENSG00000157502
ENSG00000164161
ENSG00000114200
ENSG00000144642
ENSG00000170955
ENSG00000185668
ENSG00000259250
ENSG00000259828
ENSG00000133392
ENSG00000276600
ENSG00000205403
ENSG00000069535
ENSG00000165072
ENSG00000261167
ENSG00000241769
ENSG00000139144
ENSG00000214198
ENSG00000110799
ENSG00000145476
ENSG00000283072
ENSG00000287892
ENSG00000100985
ENSG00000008517
ENSG00000079308
ENSG00000171798
ENSG00000232837
ENSG00000132000
ENSG00000163888
ENSG00000196104
ENSG00000246982
ENSG00000182809
ENSG00000121742
ENSG00000165188
ENSG00000092964
ENSG00000232653
ENSG00000064692
ENSG00000255310
ENSG00000283283
ENSG00000154856
ENSG00000164125
ENSG00000139209
ENSG00000225032
ENSG00000104327
ENSG00000108924
ENSG00000106003
ENSG00000170379
ENSG00000243276
ENSG00000276644
ENSG00000143631
ENSG00000279400
ENSG00000215458
ENSG00000183049
ENSG00000250995
ENSG00000078900
ENSG00000170477
ENSG00000068078
ENSG00000100033
ENSG00000079215
ENSG00000137642
ENSG00000139304
ENSG00000120594
ENSG00000171992
ENSG00000187258
ENSG00000107159
ENSG00000142583
ENSG00000262227
ENSG00000164099
ENSG00000165816
ENSG00000115380
ENSG00000111799
ENSG00000159527
ENSG00000166033
ENSG00000188001
ENSG00000285294
ENSG00000245648
ENSG00000082684
ENSG00000247095
ENSG00000130595
ENSG00000213859
ENSG00000130600
ENSG00000263639
ENSG00000171462
ENSG00000113083
ENSG00000151468
ENSG00000157064
ENSG00000215834
ENSG00000234785
ENSG00000134757
ENSG00000230937
ENSG00000174514
ENSG00000181143
ENSG00000134215
ENSG00000250320
ENSG00000049323
ENSG00000104765
ENSG00000188158
ENSG00000196083
ENSG00000135678
ENSG00000197641
ENSG00000133710
ENSG00000156463
ENSG00000250041
ENSG00000168386
ENSG00000181104
ENSG00000177721
ENSG00000122884
ENSG00000181333
ENSG00000123104
ENSG00000087495
ENSG00000134013
ENSG00000115461
ENSG00000129521
ENSG00000092421
ENSG00000134762
ENSG00000258793
ENSG00000234139
ENSG00000283462
ENSG00000130635
ENSG00000213626
ENSG00000251095
ENSG00000105974
ENSG00000130598
ENSG00000154529
ENSG00000152952
ENSG00000283167
ENSG00000248334
ENSG00000127324
ENSG00000186115
ENSG00000134258
ENSG00000163032
ENSG00000235427
ENSG00000199038
ENSG00000270372
ENSG00000137077
ENSG00000177706
ENSG00000204287
ENSG00000132911
ENSG00000156284
ENSG00000049249
ENSG00000225269
ENSG00000155966
ENSG00000197353
ENSG00000114251
ENSG00000174871
ENSG00000236018
ENSG00000270806
ENSG00000065717
ENSG00000253880
ENSG00000181449
ENSG00000286733
ENSG00000243970
ENSG00000272870
ENSG00000228878
ENSG00000136859
ENSG00000231720
ENSG00000204528
ENSG00000231131
ENSG00000126733
ENSG00000197993
ENSG00000266869
ENSG00000137975
ENSG00000162366
ENSG00000271895
ENSG00000279386
ENSG00000168077
ENSG00000182836
ENSG00000261051
ENSG00000065534
ENSG00000188404
ENSG00000233452
ENSG00000128918
ENSG00000236039
ENSG00000099194
ENSG00000165092
ENSG00000164530
ENSG00000160255
ENSG00000185630
ENSG00000107611
ENSG00000163817
ENSG00000131094
ENSG00000260581
ENSG00000154258
ENSG00000082497
ENSG00000213809
ENSG00000250802
ENSG00000261379
ENSG00000092969
ENSG00000163347
ENSG00000077157
ENSG00000258623
ENSG00000082196
ENSG00000182463
ENSG00000234546
ENSG00000109819
ENSG00000164932
ENSG00000187054
ENSG00000108797
ENSG00000149043
ENSG00000181458
ENSG00000243836
ENSG00000142156
ENSG00000197915
ENSG00000099260
ENSG00000198774
ENSG00000135960
ENSG00000176641
ENSG00000135821
ENSG00000170835
ENSG00000118308
ENSG00000147041
ENSG00000163531
ENSG00000106714
ENSG00000248939
ENSG00000137440
ENSG00000279588
ENSG00000112319
ENSG00000000971
ENSG00000273055
ENSG00000285820
ENSG00000016602
ENSG00000169067
ENSG00000123700
ENSG00000144476
ENSG00000187689
ENSG00000206538
ENSG00000128268
ENSG00000196344
ENSG00000100321
ENSG00000115457
ENSG00000256347
ENSG00000113946
ENSG00000138152
ENSG00000180861
ENSG00000235888
ENSG00000180155
ENSG00000185100
ENSG00000234869
ENSG00000047457
ENSG00000101210
ENSG00000185499
ENSG00000219607
ENSG00000162591
ENSG00000271447
ENSG00000223387
ENSG00000101825
ENSG00000145824
ENSG00000104826
ENSG00000149596
ENSG00000134198
ENSG00000198910
ENSG00000204882
ENSG00000282886
ENSG00000144820
ENSG00000278948
ENSG00000205041
ENSG00000150540
ENSG00000166035
ENSG00000134830
ENSG00000286001
ENSG00000115257
ENSG00000171604
ENSG00000281406
ENSG00000198535
ENSG00000205436
ENSG00000100100
ENSG00000224596
ENSG00000171385
ENSG00000261655
ENSG00000011347
ENSG00000135925
ENSG00000243566
ENSG00000218416
ENSG00000009790
ENSG00000214856
ENSG00000231351
ENSG00000267282
ENSG00000127129
ENSG00000161381
ENSG00000099840
ENSG00000175121
ENSG00000163218
ENSG00000165474
ENSG00000007306
ENSG00000286964
ENSG00000198053
ENSG00000007952
ENSG00000196188
ENSG00000117983
ENSG00000159674
